# Supplementary material for: Surface reconstruction on Ni2P@CC to form an ultrathin layer of Ni(OH)2for enhancing the capture and catalytic conversion of polysulfides in lithium–sulfur batteries
Source: Royal Society of Chemistry journal article supplement (doi:10.1039/d2ta09295f), 2023-01-01
Supplement: d2ta09295f1.pdf [file d2ta09295f1.pdf]

## Supporting information

Surface reconstruction on Ni<sub>2</sub>P@CC to form an ultrathin layer of Ni(OH)<sub>2</sub> for enhancing capture and catalytic conversion of polysulfides in lithium-sulfur batteries

Lin Peng <sup>a,b</sup>, Meixiu Qu <sup>a,b</sup>, Rui Sun <sup>a,b</sup>, Weiwei Yang <sup>a,b</sup>, Zhenhua Wang <sup>b</sup>, Wang Sun <sup>b</sup>, Yu Bai <sup>a,b,\*</sup>

<sup>a</sup> Advanced Research Institute of Multidisciplinary Science, Beijing Institute of Technology, Beijing 100081, PR China.

<sup>b</sup> Beijing Key Laboratory for Chemical Power Source and Green Catalysis, School of Chemistry and Chemical Engineering, Beijing Institute of Technology, Beijing, 100081, PR China.

\*Corresponding author: E-mail: yubaiit@163.com

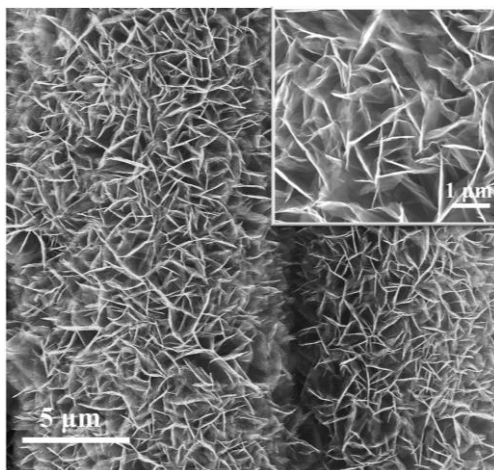

**Fig. S1.** SEM image of Ni<sub>2</sub>P@CC (Insert is the magnified SEM image of Ni<sub>2</sub>P@CC).

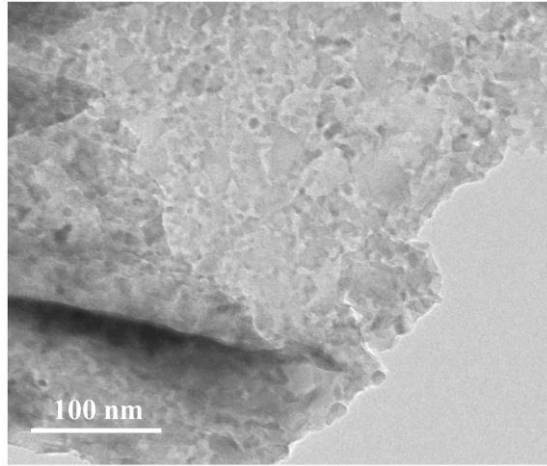

**Fig. S2.** TEM image of Ni<sub>2</sub>P.

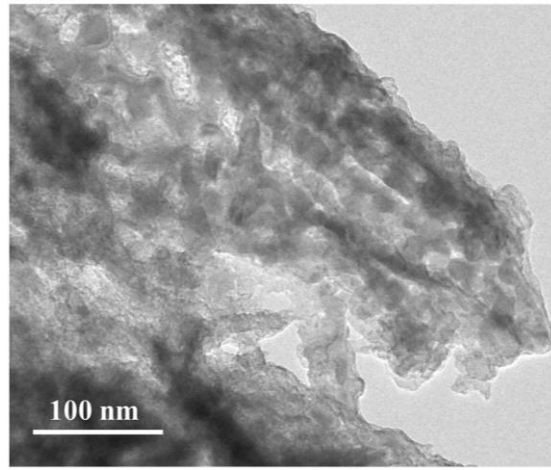

**Fig. S3.** TEM image of Ni(OH)<sub>2</sub>-Ni<sub>2</sub>P.

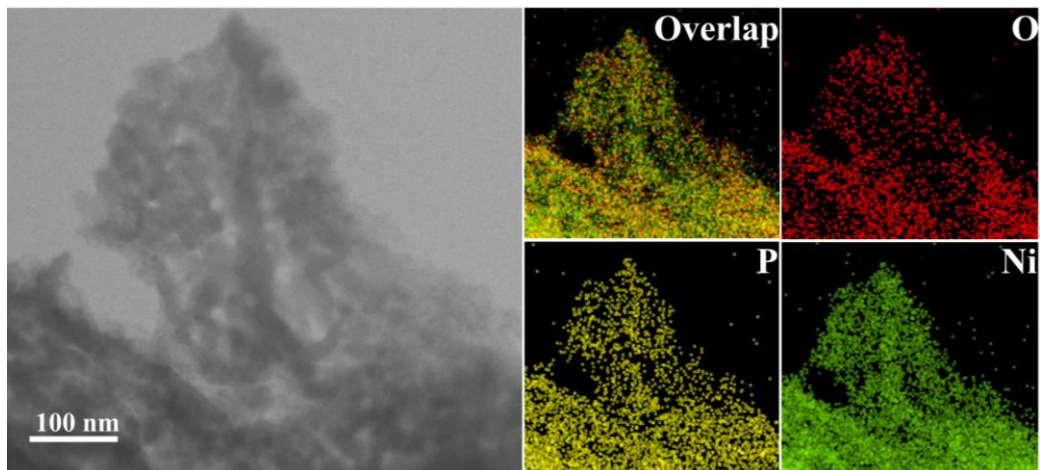

**Fig. S4.** HAADF-STEM image of  $\text{Ni}(\text{OH})_2\text{-Ni}_2\text{P@CC}$  and the corresponding elemental mappings of overlap, O, P and Ni.

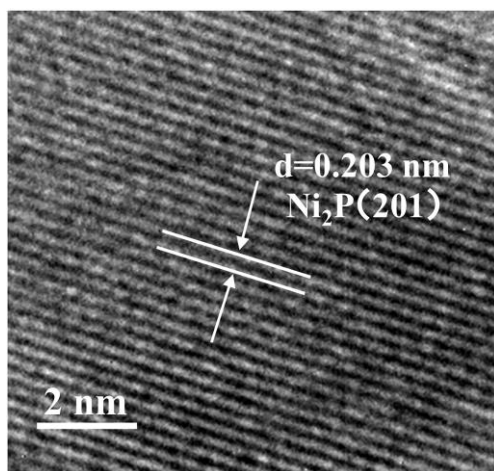

**Fig. S5.** HRTEM image of Ni<sub>2</sub>P.

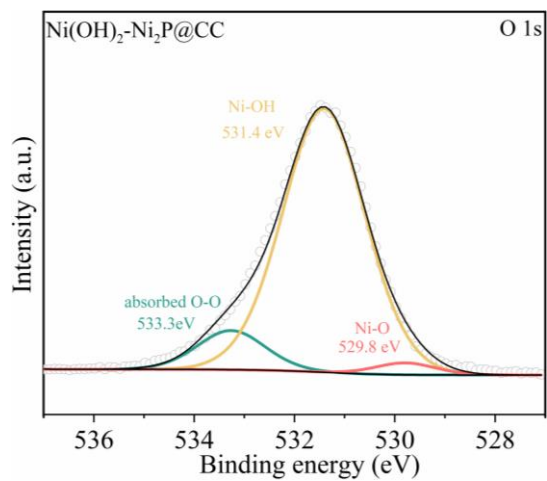

**Fig. S6.** The O 1s XPS spectrum of Ni(OH)<sub>2</sub>-Ni<sub>2</sub>P@CC.

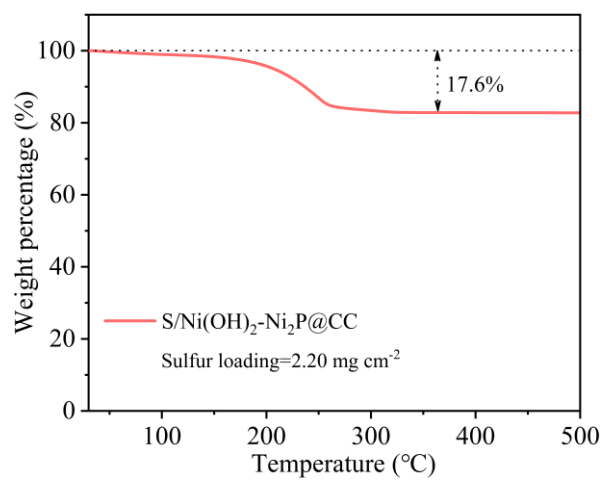

**Fig. S7.** TGA curve of S/Ni(OH)<sub>2</sub>-Ni<sub>2</sub>P@CC with a sulfur loading of 2.20mg cm<sup>-2</sup>.



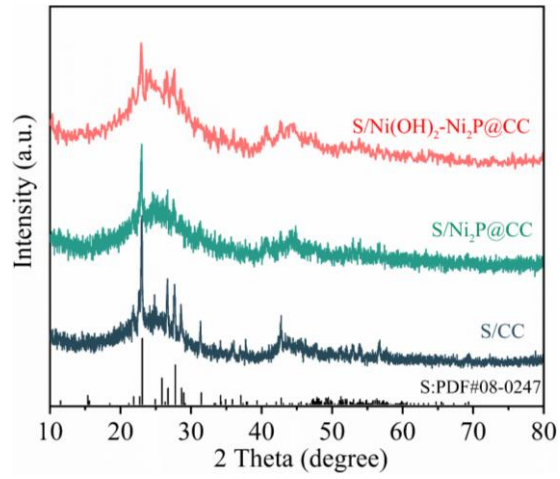

**Fig. S8.** XRD patterns of S/Ni(OH)<sub>2</sub>-Ni<sub>2</sub>P@CC, S/Ni<sub>2</sub>P@CC and S/CC.

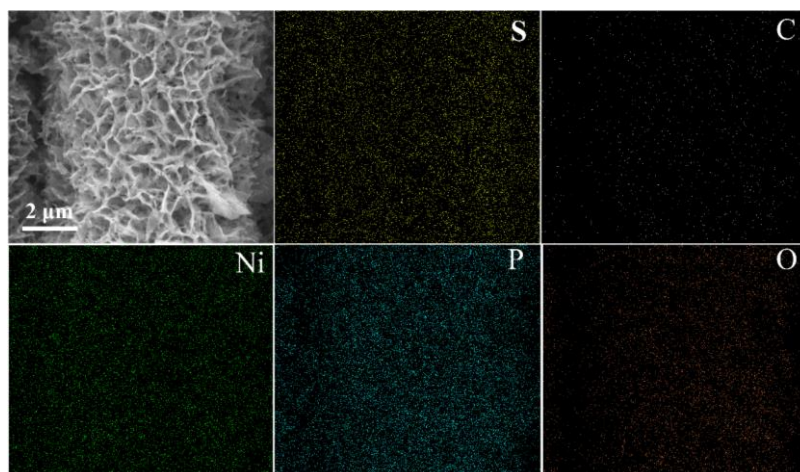

**Fig. S9.** SEM image and corresponding elemental mappings of S/Ni(OH)<sub>2</sub>-Ni<sub>2</sub>P@CC.

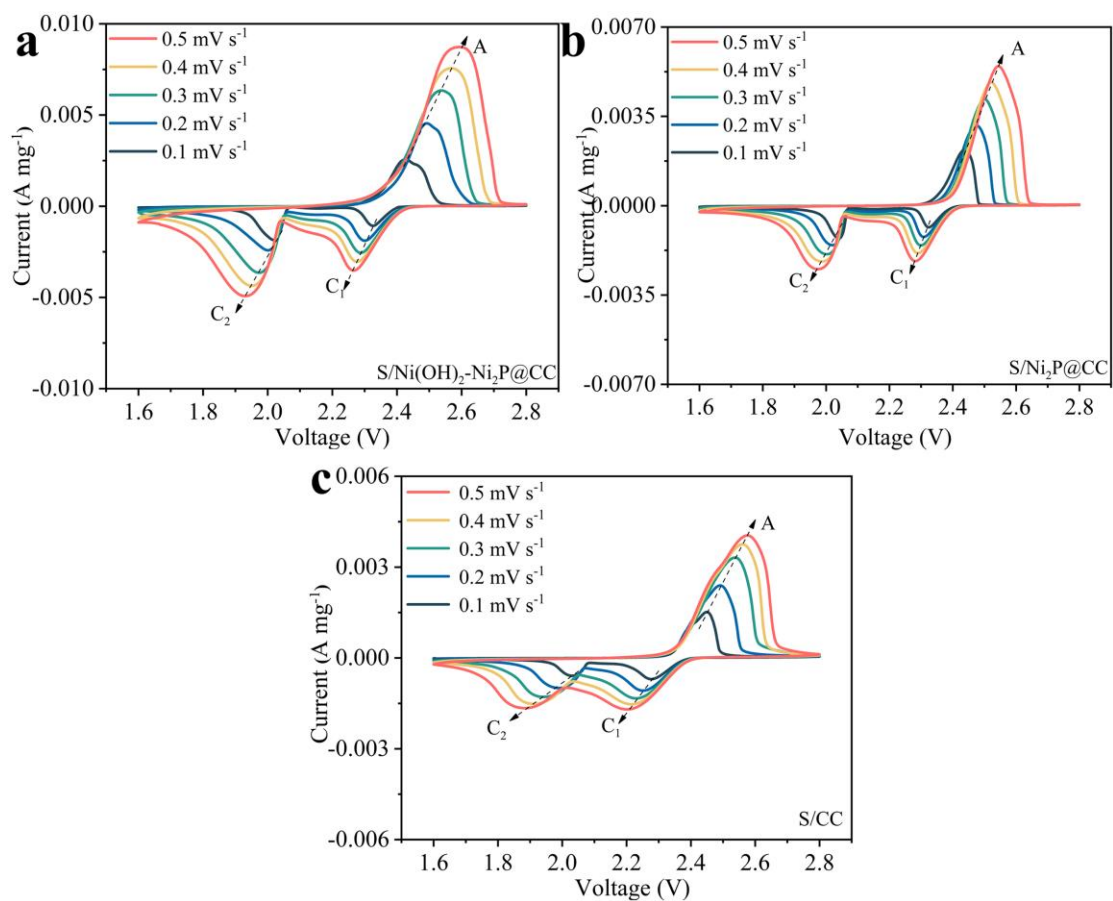

**Fig. S10.** CV curves of (a) S/Ni(OH)<sub>2</sub>-Ni<sub>2</sub>P@CC-based cell, (b) S/Ni<sub>2</sub>P@CC-based cell and (c) S/CC-based cell at scan rates of 0.1-0.5 mV s<sup>-1</sup>.

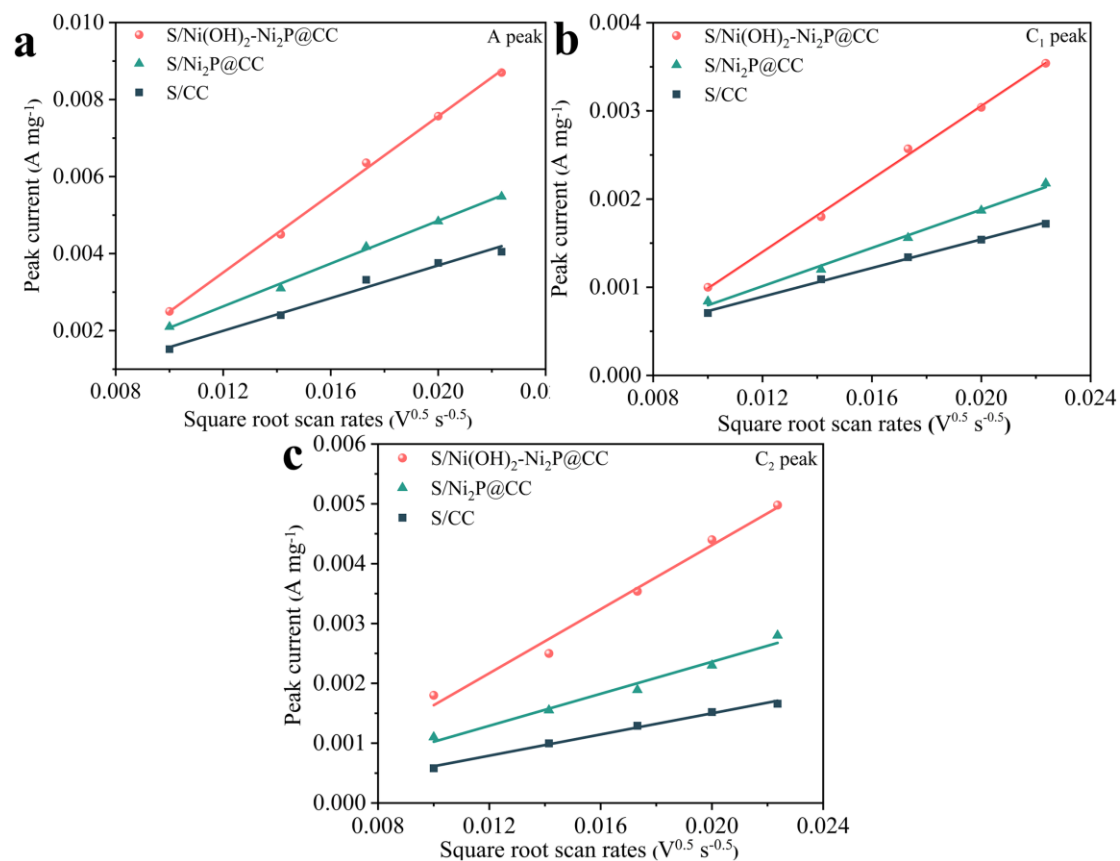

**Fig. S11.** (a) anodic oxidation process (peak A:  $\text{Li}_2\text{S}/\text{Li}_2\text{S}_2 \rightarrow \text{S}_8$ ). (b) first cathodic reduction process (peak C<sub>1</sub>:  $\text{S}_8 \rightarrow \text{Li}_2\text{S}_x$ ,  $4 \leq x \leq 6$ ). and (c) second cathodic reduction process (peak C<sub>2</sub>:  $\text{Li}_2\text{S}_x \rightarrow \text{Li}_2\text{S}/\text{Li}_2\text{S}_2$ ,  $4 \leq x \leq 6$ ) vs the square root of the scan rates.

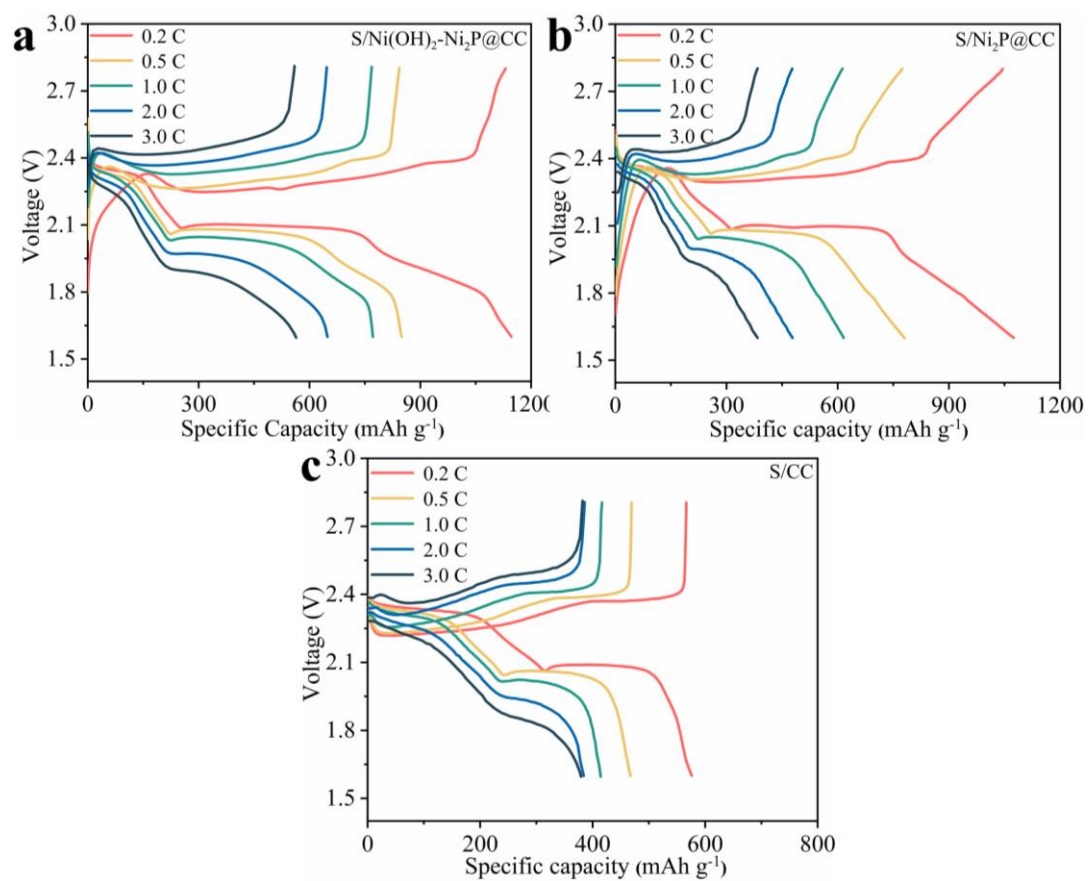

**Fig. S12.** Charge-discharge profiles of (a) S/Ni(OH)<sub>2</sub>-Ni<sub>2</sub>P@CC-based cell, (b) S/Ni<sub>2</sub>P@CC-based cell and (c) S/CC-based cell at different current density.

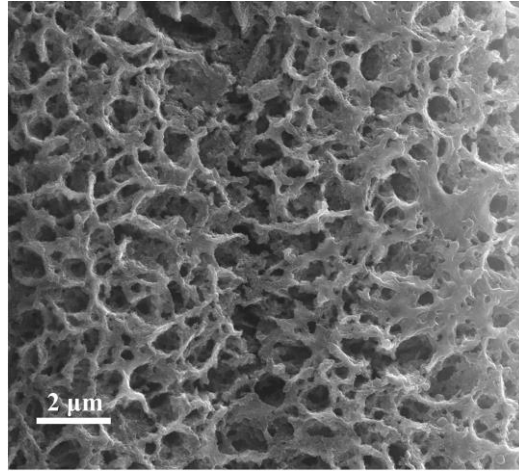

**Fig. S13.** SEM image of S/Ni(OH)<sub>2</sub>-Ni<sub>2</sub>P@CC cathode at fully charged state after 200 cycles at 1 C.

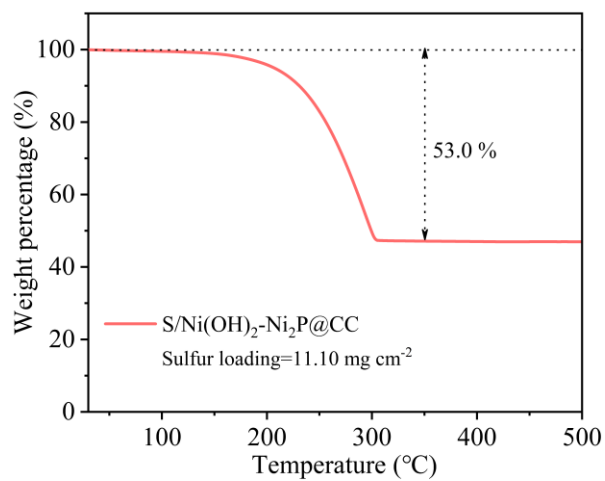

**Fig. S14.** TGA curve of S/Ni(OH)<sub>2</sub>-Ni<sub>2</sub>P@CC with a high sulfur loading of 11.10 mg cm<sup>-2</sup>.

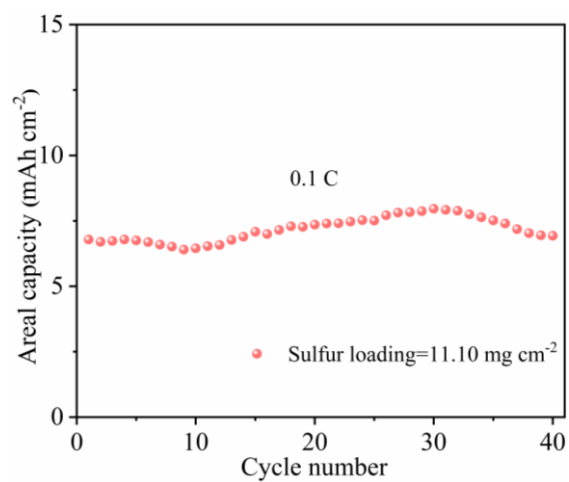

**Fig. S15.** Cycling performance of S/Ni(OH)<sub>2</sub>-Ni<sub>2</sub>P@CC-based cell at 0.1 C even with high sulfur loading (11.10 mg cm<sup>-2</sup>).



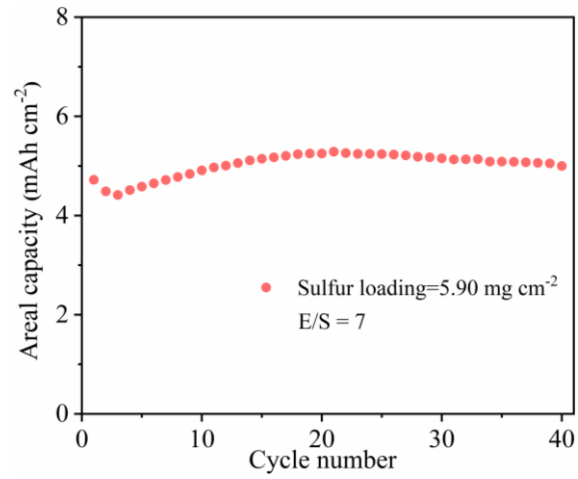

**Fig. S16.** Cycling performance of S/Ni(OH)<sub>2</sub>-Ni<sub>2</sub>P@CC-based cell with a sulfur loading of 5.90 mg cm<sup>-2</sup> under the E/S = 7  $\mu$ L<sub>E</sub> mg<sup>-1</sup>S condition.

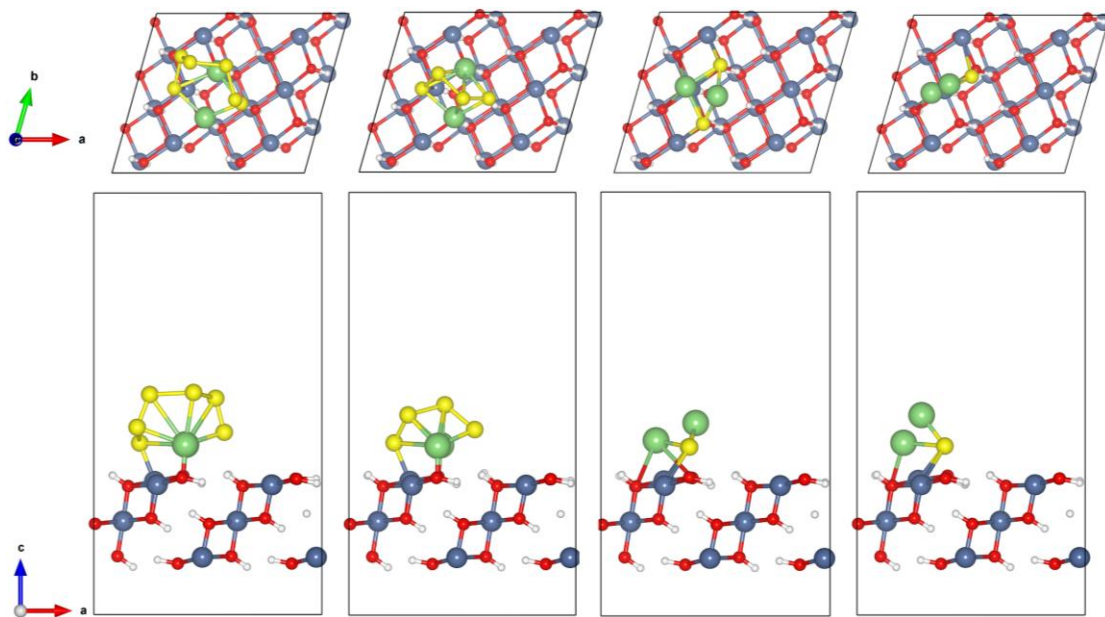

**Fig. S17.** The optimized adsorption configuration of LiPSs (Li<sub>2</sub>S<sub>6</sub>, Li<sub>2</sub>S<sub>4</sub>, Li<sub>2</sub>S<sub>2</sub>, and Li<sub>2</sub>S) adsorbed on the surface of Ni(OH)<sub>2</sub>.

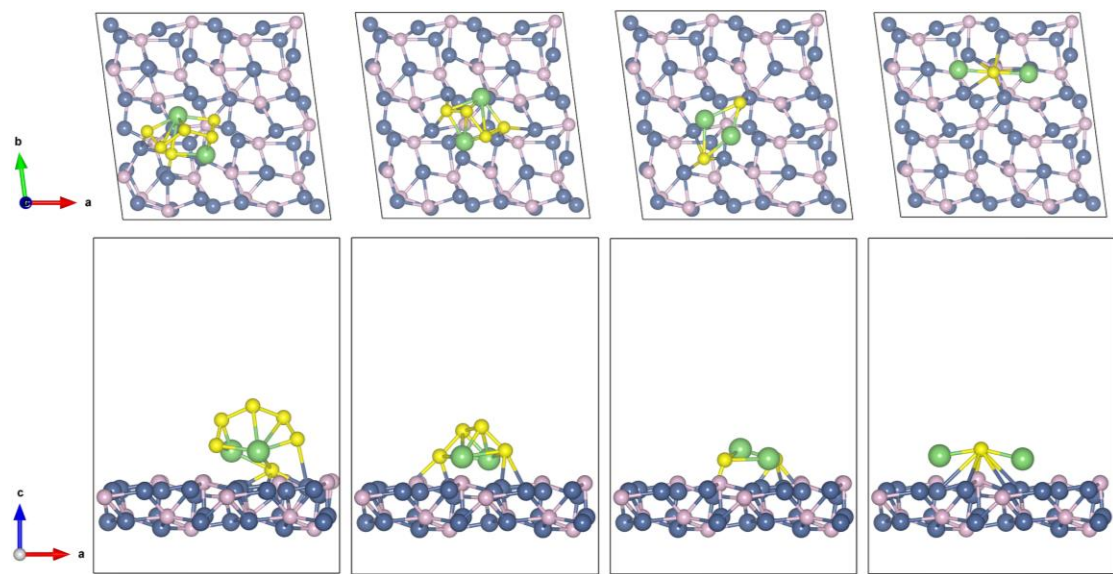

**Fig. S18.** The optimized adsorption configuration of LiPSs ( $\text{Li}_2\text{S}_6$ ,  $\text{Li}_2\text{S}_4$ ,  $\text{Li}_2\text{S}_2$ , and  $\text{Li}_2\text{S}$ ) adsorbed on the surface of  $\text{Ni}_2\text{P}$ .

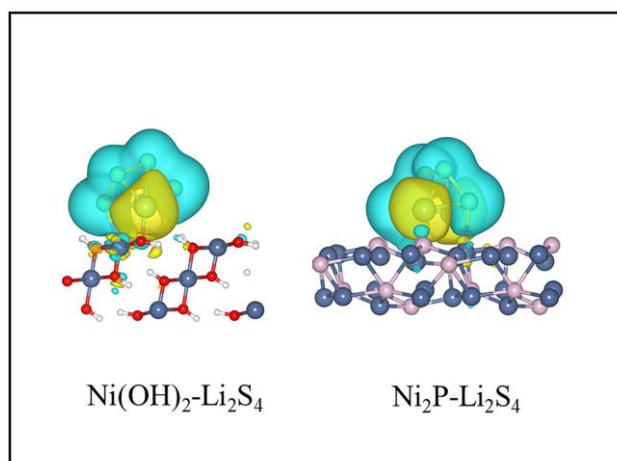

**Fig. S19.** The charge density difference plots of  $\text{Ni(OH)}_2$  and  $\text{Ni}_2\text{P}$  after binding with  $\text{Li}_2\text{S}_4$ .

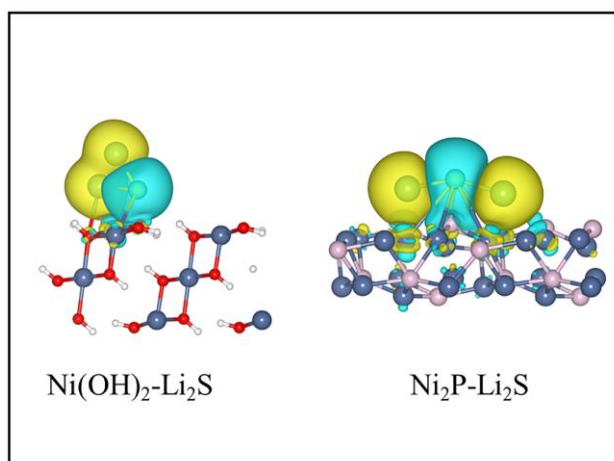

**Fig. S20.** The charge density difference plots of  $\text{Ni(OH)}_2$  and  $\text{Ni}_2\text{P}$  after binding with  $\text{Li}_2\text{S}$ .

**Table S1.** Comparisons of the  $D_{Li^+}$  of S/Ni(OH)<sub>2</sub>-Ni<sub>2</sub>P@CC, S/Ni<sub>2</sub>P@CC and S/CC based cells.

| Electrode                                   | $D_{Li^+}(\text{cm}^2 \text{ s}^{-1})$ |                       |                       |
|---------------------------------------------|----------------------------------------|-----------------------|-----------------------|
|                                             | Peak A                                 | Peak C <sub>1</sub>   | Peak C <sub>2</sub>   |
| S/Ni(OH) <sub>2</sub> -Ni <sub>2</sub> P@CC | $2.70 \times 10^{-7}$                  | $4.50 \times 10^{-8}$ | $7.54 \times 10^{-8}$ |
| S/Ni <sub>2</sub> P@CC                      | $8.13 \times 10^{-8}$                  | $1.24 \times 10^{-8}$ | $1.88 \times 10^{-8}$ |
| S/CC                                        | $4.74 \times 10^{-8}$                  | $6.97 \times 10^{-9}$ | $8.26 \times 10^{-9}$ |

**Table S2.** The EIS results of S/Ni(OH)<sub>2</sub>-Ni<sub>2</sub>P@CC, S/Ni<sub>2</sub>P@CC and S/CC based cells before and after cycling.

|                | Electrode                                   | $R_e$ ( $\Omega$ ) | $R_g$ ( $\Omega$ ) | $R_{ct}$ ( $\Omega$ ) |
|----------------|---------------------------------------------|--------------------|--------------------|-----------------------|
| before cycling | S/Ni(OH) <sub>2</sub> -Ni <sub>2</sub> P@CC | 2.61               | -                  | 22.20                 |
|                | S/Ni <sub>2</sub> P@CC                      | 2.39               | -                  | 50.00                 |
|                | S/CC                                        | 2.63               | -                  | 76.90                 |
| after cycling  | S/Ni(OH) <sub>2</sub> -Ni <sub>2</sub> P@CC | 3.65               | 2.28               | 4.89                  |
|                | S/Ni <sub>2</sub> P@CC                      | 3.26               | 3.36               | 10.23                 |
|                | S/CC                                        | 2.67               | 4.11               | 15.73                 |

**Table S3.** The electrochemical performance comparison of the S/Ni(OH)<sub>2</sub>-Ni<sub>2</sub>P@CC-based cell with other articles.

| Electrode                                   | Sulfur loading (mg cm <sup>-2</sup> ) | E/S ratio (μL mg <sup>-1</sup> ) | Rate  | Areal capacity (mAh cm <sup>-2</sup> ) | Ref       |
|---------------------------------------------|---------------------------------------|----------------------------------|-------|----------------------------------------|-----------|
| S/Ni(OH) <sub>2</sub> -Ni <sub>2</sub> P@CC | 5.9                                   | 7.0                              | 0.1 C | 5.28                                   | This work |
| Co/CNT@GF-S                                 | 5.1                                   | 15.0                             | 0.1 C | 4.93                                   | 1         |
| CC@CS@HPP/S                                 | 5.6                                   | 10.0                             | 0.1 C | 5.10                                   | 2         |
| S-C@MoS <sub>2</sub>                        | 4.0                                   | 10.0                             | 0.1 C | 3.30                                   | 3         |
| VSe <sub>2</sub> -VG@CC/S                   | 5.5                                   | 8.4                              | 0.1 C | 4.10                                   | 4         |
| Co-NbN/rGO/S                                | 5.6                                   | 8.0                              | 0.1 C | 3.92                                   | 5         |
| BTO-MS-BPC/S                                | 4.5                                   | 8.0                              | 0.1C  | 3.93                                   | 6         |
| S-Ni <sub>2</sub> Co@rGO                    | 4.0                                   | 6.0                              | 0.1 C | 4.53                                   | 7         |
| 3DOM NC@V-ZnO/S                             | 5.8                                   | 4.4                              | 0.2 C | 4.40                                   | 8         |



## Reference

1. Y. Xie, J. Ao, L. Zhang, Y. Shao, H. Zhang, S. Cheng and X. Wang, *Chem. Eng. J.*, 2023, **451**, 139017.
2. Z. Ye, Y. Jiang, L. Li, F. Wu and R. Chen, *Adv. Mater.*, 2020, **32**, 2002168.
3. Q. Wu, Z. Yao, X. Zhou, J. Xu, F. Cao and C. Li, *Acs Nano*, 2020, **14**, 3365-3377.
4. H. Ci, J. Cai, H. Ma, Z. Shi, G. Cui, M. Wang, J. Jin, N. Wei, C. Lu, W. Zhao, J. Sun and Z. Liu, *ACS Nano*, 2020, **14**, 11929-11938.
5. W. Ge, L. Wang, C. Li, C. Wang, D. Wang, Y. Qian and L. Xu, *J. Mater. Chem. A.*, 2020, **8**, 6276-6282.
6. C. Chang, S. Di, G. Gao, B. Zhai, S. Chen, S. Wang, X. Liu and L. Li, *Chem. Eng. J.*, 2022, **435**, 135031.
7. G. Li, W. Qiu, W. Gao, Y. Zhu, X. Zhang, H. Li, Y. Zhang, X. Wang and Z. Chen, *Adv. Funct. Mater.*, 2022, **32**, 2202853.
8. X. Zhao, Y. Guan, X. Du, G. Liu, J. Li and G. Li, *Chem. Eng. J.*, 2022, **431**, 134242.
